# Supplementary material for: Integrated Sustainability Planning and Local Food Systems: Examining Areas of and Gaps in Food Systems Integration in Community Sustainability Plans for Municipalities across British Columbia
Source: MDPI journal article supplement (doi:10.3390/su14116724), 2022-05-31
Supplement: s1 [file s1]

## Supplementary Materials

Table S1: List of ICSPs according to region and sub-region

| Region                     | Sub-region                                                                 | Municipality ICSPs                                                  |                                                                    |
|----------------------------|----------------------------------------------------------------------------|---------------------------------------------------------------------|--------------------------------------------------------------------|
| North region               | a) North Central and Cariboo<br>b) North Coast<br>c) Peace River           | 100 Mile House - "Miles Ahead"                                      | Burns-Lake-ICSP-Report-FINAL                                       |
|                            |                                                                            | Our-Quesnel                                                         | Telkwa_ICSP                                                        |
|                            |                                                                            | Prince George_ICSP                                                  | Hudson's Hope ICSP                                                 |
|                            |                                                                            | Valemount_ICSP                                                      | District of Taylor                                                 |
|                            |                                                                            | Williams<br>Lake_ICSP_Framework_Final_Draft                         | Terrace-2050-Sustainability-Strategy-DRAFT-Oct-2009                |
| Southeast region           | a) East Kootenay and Rocky Mountain<br>b) West Kootenay and Boundary       | Cultivating Creston Integrated Community Sustainability Plan (ICSP) | Forever Fernie - Integrated Community Sustainability Plan (ICSP)   |
|                            |                                                                            | District of Elkford                                                 | Rossland                                                           |
|                            |                                                                            | Nelson Path to 2040 Sustainability Strategy                         | Sustainable-Salmo-OCP-June-5-2017                                  |
|                            |                                                                            | Imagine_Invermere_ICSP_Final_2011                                   | Village of New Denver Sustainable Community Plan -Final            |
|                            |                                                                            | ImagineKimberley ICSP Document                                      | Grandforks_Finaldraft_ICSP_Plan2011                                |
|                            |                                                                            | Sparwood_Community Sustainability Plan                              | Cranbrook-Connected-Final                                          |
|                            |                                                                            | Kaslo_June_2014                                                     | Imagine-Montrose-ICSP-2015-FINAL                                   |
| South central region       | a) Okanagan Valley and Similkameen<br>b) Thompson and Shuswap and Columbia | District of Lake Country (ICSP)                                     | Revelstoke ICSP (1"4)                                              |
|                            |                                                                            | Osoyoos Succeed ICSP – Final draft                                  | Revelstoke ICSP (2"4)                                              |
|                            |                                                                            | Our Enderby_ICSP(1"2)                                               | Revelstoke ICSP (3"4)                                              |
|                            |                                                                            | Our Enderby_ICSP-(2"2)                                              | Revelstoke ICSP (4"4)                                              |
|                            |                                                                            | Peachland Plan                                                      | Sun Peaks - Sustainability Action Plan (2"2)                       |
|                            |                                                                            | Clinton_Sustainability_Plan                                         | Sun Peaks Greenhouse Gas Management Plan (3"3)                     |
|                            |                                                                            | Squamish_Lillooet_ICSP                                              | SunPeaks_Social_Sustainability_Plan                                |
|                            |                                                                            | SustainableKamloopsPlan-Foundations                                 |                                                                    |
| Southwest region           | Lower Mainland                                                             | Abbotsford_2013_Community Sustainability Strategy                   | City of North Vancouver_100 Year Sustainability Vision             |
|                            |                                                                            | Hope_ICSP                                                           | Harrison ICSP                                                      |
|                            |                                                                            | City of Surrey_Sustainability Charter                               | Langley Township Sustainability Charter                            |
|                            |                                                                            | City of Vancouver_Greenest City                                     | NewWestminster_Envision_2032                                       |
|                            |                                                                            | District of North Vancouver_ICSP                                    | Whistler2020                                                       |
|                            |                                                                            |                                                                     |                                                                    |
| Vancouver and Gulf islands | North and Central Vancouver Island/Sunshine Coast                          | Campbell River's ICSP                                               | Sechelt_ICSP-Goals-Actions-2019 (Final)                            |
|                            |                                                                            | Qualicum Beach Sustainability Strategy - March 18, 2010 (draft)     | Tofino vision to action sustainable community action plan          |
|                            |                                                                            | Nanaimo community sustainability action plan                        | Zeballos, nuchatlaht and ka-'yu-'k't'h'"che-k'tles7et'h'-icsp_2014 |
|                            |                                                                            | Powell River ICSP Final Aug 20th                                    | Sustainable Duncan                                                 |
|                            |                                                                            | Comox Valley Sustainability Strategy                                | Sustainable Highlands                                              |
